# Supplementary material for: Cell-Cycle Dependence of Transcription Dominates Noise in Gene Expression
Source: PubMed Central journal article supplement (PMC3723585; doi:10.1371/journal.pcbi.1003161), 2013-07-25
Supplement: pcbi.1003161.s019.pdf [file pcbi.1003161.s019.pdf]

**Table S1. Yeast strains used in this study**

| Strain | Relevant Genotype                                                                                                                                 | Parent Strain | Reference                     |
|--------|---------------------------------------------------------------------------------------------------------------------------------------------------|---------------|-------------------------------|
| Y1     | <i>MATa trp1-1 can1-100 leu2-3,112 his 3-11,5 ura3 GAL+ ADE+</i>                                                                                  | W303          | Laboratory collection         |
| Y3     | <i>MATa ade2-1 trp1-1 can1-100 leu2-3,112 his 3-11,5 ura3 GAL+</i>                                                                                | W303          | Laboratory collection         |
| Y6     | <i>MATa ade2-1 trp1-1 can1-100 leu2-3,112 his 3-11,5 ura3 GAL+</i>                                                                                | W303          | Laboratory collection         |
| Y47    | <i>MATa leu2::P<sub>ADHI</sub>-CFP-<br/>hisG::URA3::kanR::hisG</i>                                                                                | Y1            | Gift from E. O'Shea<br>[26]   |
| Y139   | <i>MATa his3::P<sub>1xtetO</sub>-vYFP-HIS3</i>                                                                                                    | Y1 +B163      | Laboratory collection         |
| Y163   | <i>MATa his3::P<sub>7xtetO</sub>-vYFP-HIS3</i>                                                                                                    | Y1 +B165      | Laboratory collection         |
| Y216   | <i>MATa ade2-1 ura3::P<sub>7xtetO</sub>-vYFP-kanR</i>                                                                                             | Y6            | Laboratory collection<br>[27] |
| Y231   | <i>MATa leu2::P<sub>PGK1</sub>-RFP ADE2::P<sub>MYO2</sub>-<br/>tTA ura3::P<sub>7xtetO</sub>-CFP-kanR</i>                                          | Y3            | Laboratory collection<br>[27] |
| Y236   | <i>MATa/α leu2::P<sub>PGK1</sub>-RFP ADE2::P<sub>MYO2</sub>-<br/>tTA ura3/ura3::P<sub>7xtetO</sub>-CFP-kanR/<br/>P<sub>7xtetO</sub>-vYFP-kanR</i> | Y231xY216     | This study                    |
| EY2210 | <i>MATa ADE+ NHP2::RFP-NAT<br/>spl2Δ::LEU2 pho4Δ::PHO4(1-741bp)-<br/>cYFP-HIS3 pho84Δ::CFP-kanR</i>                                               | W303          | Gift from E. O'Shea           |
| EY2150 | <i>MATa ADE+ NHP2::RFP-NAT<br/>spl2Δ::LEU2 pho84Δ::CFP-kanR</i>                                                                                   | W303          | Gift from E. O'Shea           |

| <i>PHO4::cYFP-HIS3</i> |                                                                                                                                                                                            |                                            |                                       |
|------------------------|--------------------------------------------------------------------------------------------------------------------------------------------------------------------------------------------|--------------------------------------------|---------------------------------------|
| EY131                  | <i>MATa pho4Δ::TRP1</i>                                                                                                                                                                    | W303                                       | Gift from E. O'Shea                   |
| Y114                   | <i>MATa ADE+ NHP2::RFP-NAT</i><br><i>spl2Δ::LEU2 pho84Δ::CFP-kanR</i><br><i>pho4Δ::TRP1</i>                                                                                                | EY2210<br>(EY131<br>PCR<br>template)       | This study                            |
| Y152                   | <i>MATa ADE+ NHP2::RFP-NAT</i><br><i>spl2Δ::LEU2 pho4Δ::TRP1</i><br><i>pho84Δ::CFP-kanR phm4Δ::P<sub>GPD</sub>-</i><br><i>PHO81-HIS3MX6 leu2Δ::P<sub>TEF1m7</sub>-</i><br><i>PHO4-cYFP</i> | Y114 (+<br>B133 PCR<br>product, +<br>B141) | Laboratory collection                 |
| Y320                   | <i>MATa ADE+ NHP2::RFP-NAT</i><br><i>spl2Δ::LEU2 pho4Δ::TRP1</i><br><i>pho84Δ::KIURA3</i>                                                                                                  | Y114                                       | This study                            |
| Y532                   | <i>MATa doa1::vYFP + pRS316-DOA1</i>                                                                                                                                                       | Y1 + B858                                  | This study                            |
| Y784                   | <i>MATa ADE+ NHP2::RFP-NAT</i><br><i>spl2Δ::LEU2 pho4Δ::TRP1</i><br><i>pho84Δ::klura3</i>                                                                                                  | Y320                                       | This study                            |
| Y785                   | <i>MATa ADE+ NHP2::RFP-NAT</i><br><i>spl2Δ::LEU2 pho4Δ::TRP1</i><br><i>pho84Δ::klura3 phm4Δ::HIS3MX6</i>                                                                                   | Y784                                       | This study ("kinetic"<br>base strain) |
| Y947                   | <i>MATa ADE+ NHP2::RFP-NAT</i><br><i>spl2Δ::LEU2 pho4Δ::TRP1</i><br><i>pho84Δ::klura3 phm4Δ::HIS3MX6</i><br><i>leu2Δ::P<sub>TEF1m7</sub>-PHO4ΔP2-tetR-cYFP</i>                             | Y785<br>(+B798)                            | This study                            |

|       |                                                                                                                                                                                                                                                                                                                                    |                 |            |
|-------|------------------------------------------------------------------------------------------------------------------------------------------------------------------------------------------------------------------------------------------------------------------------------------------------------------------------------------|-----------------|------------|
| Y955  | <i>MAT<math>\alpha</math> his3::P<sub>1tetO</sub>-tdTomato-HIS3</i>                                                                                                                                                                                                                                                                | Y2 (+B229)      | This study |
| Y960  | <i>MAT<math>\alpha</math> ADE+ NHP2::RFP-NAT</i><br><i>spl2<math>\Delta</math>::LEU2 pho4<math>\Delta</math>::TRP1</i><br><i>pho84<math>\Delta</math>::klura3 phm4<math>\Delta</math>::HIS3MX6</i><br><i>leu2<math>\Delta</math>::P<sub>TEF1m7</sub>-PHO4<math>\Delta</math>P2-tetR-cYFP</i><br><i>URA3::P<sub>1tetO</sub>-CFP</i> | Y947<br>(+B579) | This study |
| Y962  | <i>MAT<math>\alpha</math> ADE+ NHP2::RFP-NAT</i><br><i>spl2<math>\Delta</math>::LEU2 pho4::TRP1</i><br><i>pho84<math>\Delta</math>::klura3 phm4::HIS3MX6</i><br><i>leu2<math>\Delta</math>::P<sub>TEF1m7</sub>-PHO4<math>\Delta</math>P2-tetR-cYFP</i><br><i>URA3::P<sub>7tetO</sub>-CFP</i>                                       | Y947<br>(+B720) | This study |
| Y1011 | <i>MAT<math>\alpha</math>/<math>\alpha</math> his3/his3::P<sub>1tetO</sub>-vYFP-</i><br><i>HIS3/P<sub>1tetO</sub>-tdTomato-HIS3</i>                                                                                                                                                                                                | Y139 x<br>Y955  | This study |
