# Supplementary material for: Cell-Cycle Dependence of Transcription Dominates Noise in Gene Expression
Source: PubMed Central journal article supplement (PMC3723585; doi:10.1371/journal.pcbi.1003161), 2013-07-25
Supplement: pcbi.1003161.s020.pdf [file pcbi.1003161.s020.pdf]

**Table S2. Plasmids used in strain construction**

| Plasmid | Base vector       | Relevant gene                      | Construction information                                                                                                                                                                  |
|---------|-------------------|------------------------------------|-------------------------------------------------------------------------------------------------------------------------------------------------------------------------------------------|
| B48     | Yeast centromeric | $P_{I_{tetO}}-CFP$                 | Laboratory stock                                                                                                                                                                          |
| B89     | pJRL2             | $P_{PGK1}-vYFP$                    | Laboratory stock, <i>leu2</i> integrating vector [26]                                                                                                                                     |
| B108    | pBluescript       | <i>KIURA3</i>                      | Laboratory stock, contains <i>URA3</i> gene from <i>K. lactis</i> ; PCR template for <i>pho84Δ</i> in Y320                                                                                |
| B129    | pRS303            | <i>HIS3MX6</i>                     | <i>HIS3MX6</i> from pFA6a- <i>HIS3MX6</i> [28] (BglII/EcoRI digested) ligated into pRS303 (BamHI/EcoRI); PCR template for <i>phm4Δ</i> in Y785                                            |
| B133    | pRS303            | $P_{GPD}-PHO84-$<br><i>HIS3MX6</i> | Into pRS303, cloned $P_{GPD}-PHO84$ (SalI/PvuII into SalI/EcoRV) and <i>HIS3MX6</i> (BglII/EcoRI into BamHI/EcoRI)                                                                        |
| B141    | pJRL2             | $P_{TEF1m7}-PHO4 -$<br><i>cYFP</i> | PCRed <i>PHO4-Citrine</i> from EY2150 genome and clone $P_{TEF1m7}$ (SalI/EcoRI) – <i>PHO4</i> – <i>Citrine</i> (EcoRI/NotI) into SalI/NotI digested pJRL2 (B89). $P_{TEF1m7}$ from [29]. |
| B163    | pRS303            | $P_{I_{tetO}}-vYFP$                | Laboratory stock                                                                                                                                                                          |
| B165    | pRS303            | $P_{7tetO}-vYFP$                   | Laboratory stock                                                                                                                                                                          |
| B198    | pRS303            | $P_{7tetO}-tTA$                    | Laboratory stock                                                                                                                                                                          |
| B228    | pCM189            | $P_{ADH1}-tTA$                     | Laboratory stock                                                                                                                                                                          |

|      |             |                                                 |                                                                                                                                                                                     |
|------|-------------|-------------------------------------------------|-------------------------------------------------------------------------------------------------------------------------------------------------------------------------------------|
| B229 | pRS303      | $P_{I_{tetO}}-tdTomato$                         | Laboratory stock                                                                                                                                                                    |
| B464 | pBluescript | <i>klura3</i>                                   | Digested B108 with EcoRV and self-ligated to remove portion of ORF and make <i>KIURA3</i> non-functional; PCR template for <i>klura3</i> Y784                                       |
| B579 | pRS306      | $P_{I_{tetO}}-CFP$                              | XhoI/NotI digested $P_{I_{tetO}}-CFP$ from B48 ligated in front of $T_{ACT1}$ in pRS306 (XhoI/NotI)                                                                                 |
| B720 | pRS306      | $P_{7_{tetO}}-CFP$                              | XhoI/BamHI digested $P_{7_{tetO}}-CFP$ from B198 ligated in front of $T_{ACT1}$ in pRS306 (XhoI/NotI)                                                                               |
| B798 | pJRL2       | $P_{TEF1m7}-PHO4\Delta P2-$<br><i>tetR-cYFP</i> | $P_{TEF1m7}$ (SalI/EcoRI) – <i>PHO4</i> (1-600bp) (EcoRI/SpeI) – linker – <i>tetR</i> (SpeI/PacI) – linker – <i>Citrine</i> (PacI/NotI) ligated into SalI/NotI digested pJRL2 (B89) |
| B858 | pRS316      | $P_{DOA1}-DOA1$                                 | PCRed <i>DOA1</i> locus from Y1 (BamHI/NotI) and ligated into pRS316                                                                                                                |
