# Supplementary material for: Cell-Cycle Dependence of Transcription Dominates Noise in Gene Expression
Source: PubMed Central journal article supplement (PMC3723585; doi:10.1371/journal.pcbi.1003161), 2013-07-25
Supplement: pcbi.1003161.s021.pdf [file pcbi.1003161.s021.pdf]

**Table S3. Comparing experimental mRNA expression distributions to simple models**

|                                                                                                                                                                                                                          | A                                       | B          | C                                | D           | E                          | F          |
|--------------------------------------------------------------------------------------------------------------------------------------------------------------------------------------------------------------------------|-----------------------------------------|------------|----------------------------------|-------------|----------------------------|------------|
|                                                                                                                                                                                                                          | tetO promoter without activator (basal) |            | tetO promoter with tTA activator |             | Constitutive DOA1 promoter |            |
|                                                                                                                                                                                                                          | 1xtetO**                                | 7xtetO***  | 1xtetO                           | 7xtetO      | Higher                     | Lower      |
| <b>Ratio of mean mRNA at late G2/M to G1 as a measure of fold-change in transcription:</b>                                                                                                                               |                                         |            |                                  |             |                            |            |
| $\hat{R}_M$ (measured)                                                                                                                                                                                                   | 9.3                                     | 3.1        | 2.8                              | 2.7         | 2.4                        | 4.2        |
| Theoretical corresponding $f$                                                                                                                                                                                            | Inf                                     | 4.3        | 3.6                              | 3.3         | 2.7                        | 8.9        |
| <b>Negative binomial fit to total distribution:</b><br>The standard model equates a frequency and size of bursting to parameters of negative binomial fit to total population's stationary distribution.                 |                                         |            |                                  |             |                            |            |
| "Burst frequency"                                                                                                                                                                                                        | <b>0.4</b>                              | <b>0.5</b> | <b>2.2</b>                       | <b>1.2</b>  | <b>4.1</b>                 | <b>1.1</b> |
| "Burst size"                                                                                                                                                                                                             | <b>7.7</b>                              | <b>8.5</b> | <b>5.8</b>                       | <b>10.0</b> | <b>1.4</b>                 | <b>1.3</b> |
| <b>2-fold transcription increase: *</b><br>Poisson transcription with S/G2/M transcription rate increased 2-fold over G1 transcription rate.<br>The transcription rate is fit to the experimental total mean mRNA count. |                                         |            |                                  |             |                            |            |
| $f$                                                                                                                                                                                                                      | <b>2</b>                                | <b>2</b>   | <b>2</b>                         | <b>2</b>    | <b>2</b>                   | <b>2</b>   |
| $\chi^2$ fit p-value, Total                                                                                                                                                                                              | 0                                       | 0          | 0                                | 0           | 0.95                       | 0.96       |
| $\chi^2$ fit p-value, G1                                                                                                                                                                                                 | 0                                       | 0          | 0                                | 0           | 0.02                       | 0.002      |
| $\chi^2$ fit p-value, G2                                                                                                                                                                                                 | 0                                       | 0          | 0                                | 0.001       | 0.001                      | 0.001      |

| <b><i>f</i>-fold transcription increase: *</b>                                                                                                                                                                                                                                                                             |            |            |          |           |          |           |
|----------------------------------------------------------------------------------------------------------------------------------------------------------------------------------------------------------------------------------------------------------------------------------------------------------------------------|------------|------------|----------|-----------|----------|-----------|
| Poisson transcription with S/G2/M transcription rate increased <i>f</i> -fold over G1 transcription rate.<br>The transcription rate and <i>f</i> are fit to the experimental G1 and G2 mean mRNA count.                                                                                                                    |            |            |          |           |          |           |
| <b><i>f</i></b>                                                                                                                                                                                                                                                                                                            | <b>Inf</b> | <b>100</b> | <b>4</b> | <b>9</b>  | <b>4</b> | <b>12</b> |
| $\chi^2$ fit p-value, Total                                                                                                                                                                                                                                                                                                | 0.06       | 0.002      | 0.14     | 0.07      | 0.004    | 0.12      |
| $\chi^2$ fit p-value, G1                                                                                                                                                                                                                                                                                                   | 0.69       | 0.17       | 0.46     | 0.84      | 0        | 0.002     |
| $\chi^2$ fit p-value, G2                                                                                                                                                                                                                                                                                                   | 0.004      | 0          | 0.18     | 0.007     | 0.78     | 0.69      |
| <b><i>F</i>-fold transcription increase with variable timing of transition: *</b>                                                                                                                                                                                                                                          |            |            |          |           |          |           |
| Poisson transcription with S/G2/M transcription rate increased <i>f</i> -fold over G1 transcription rate with a 40 minute uniformly distributed window of switching to S/G2/M transcription rates after the S/G1 transition.<br>The transcription rate and <i>f</i> are fit to the experimental G1 and G2 mean mRNA count. |            |            |          |           |          |           |
| <b><i>F</i></b>                                                                                                                                                                                                                                                                                                            | <b>Inf</b> | <b>100</b> | <b>6</b> | <b>13</b> | <b>7</b> | <b>18</b> |
| $\chi^2$ fit p-value, Total                                                                                                                                                                                                                                                                                                | 0.85       | 0.003      | 0.13     | 0.15      | 0        | 0         |
| $\chi^2$ fit p-value, G1                                                                                                                                                                                                                                                                                                   | 0.35       | 0.06       | 0.30     | 0.73      | 0        | 0         |
| $\chi^2$ fit p-value, G2 *                                                                                                                                                                                                                                                                                                 | 0.01       | 0          | 0.84     | 0.76      | 0.06     | 0.27      |

\* Result of a  $\chi^2$  goodness of fit test of the measured data against the model prediction. Cases that pass or fail are in black or gray text, respectively with  $p = 0.05$  representing the cutoff.

\*\* For basal expression from  $P_{1_{\text{tetO}}}$ , the G1 and S/G2/M expression differ more than expected for no transcription in G1. Thus the data is best fit where  $f = \text{infinity}$ , representing no G1 transcription.

\*\*\* For basal expression from  $P_{7_{\text{tetO}}}$ , because of high expression noise and the fact that 10% of cells have not turned on by late G2/M, specifying *f* by matching G1 and S/G2/M means gives a value of *f* (~7) that fits distributions poorly. The  $\chi^2$  goodness of fit was maximal and fairly constant over a range of approximately  $50 < f < 100$ . Thus,  $f = 100$  was selected. For the model with variable timing of transitioning to G2 transcription rates, the estimated 40 minute window was extended to the full duration of S/G2/M.
